# Supplementary material
Source: PubMed Central journal article supplement (PMC4665781)
Supplement: JCI81031.sd.pdf [file JCI81031.sd.pdf]

## Supplementary Materials:

### Supplemental Figures

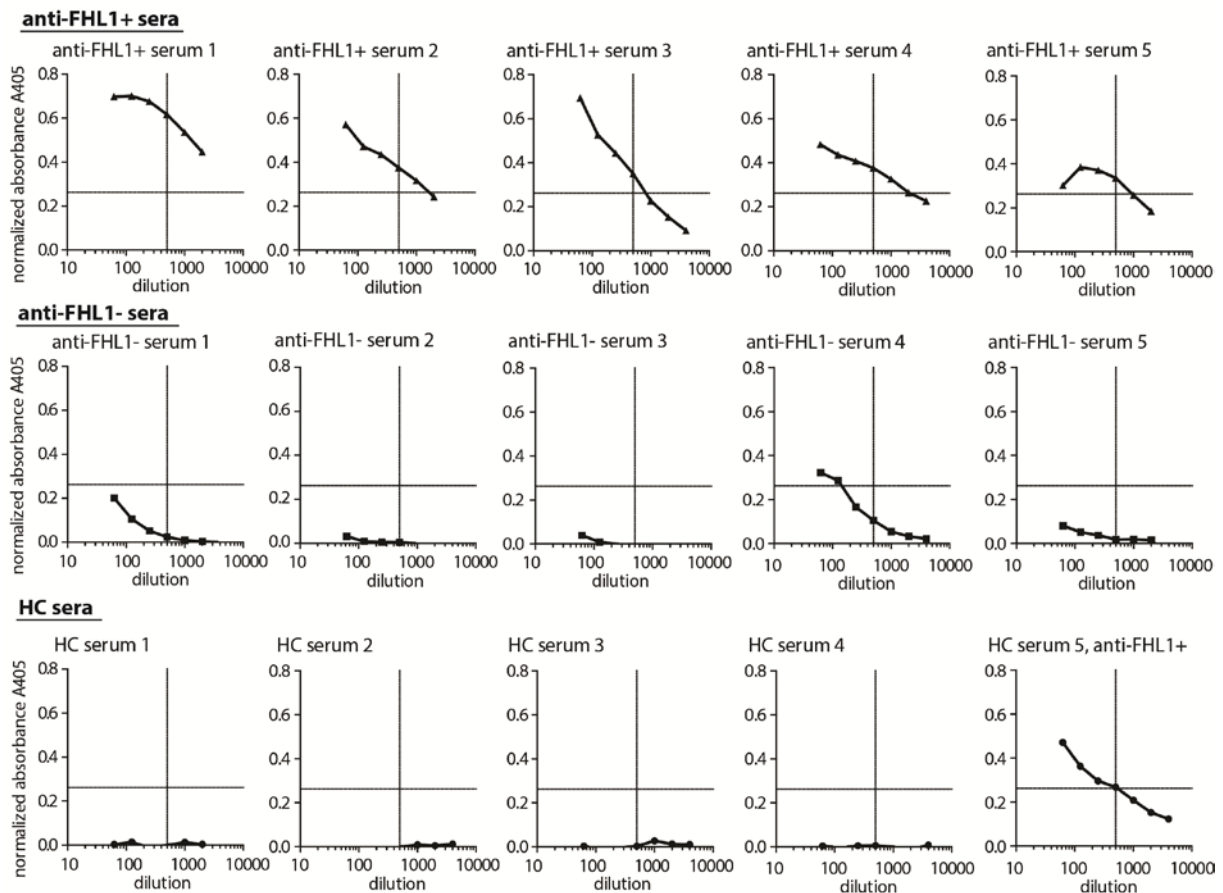

**Supplemental Figure 1: Serial dilution ELISA of anti-FHL1<sup>+</sup>, anti-FHL1<sup>-</sup> and HC sera.** Sera of 5 anti-FHL1<sup>+</sup> IIM patients (upper panel), 5 anti-FHL1<sup>-</sup> patients (middle panel) and 5 HCs (lower panel) were analyzed by serial dilution ELISA for reactivity to recombinant FHL1-MaBP fusion protein. Starting dilution was 1:62.5 and sera were serially diluted in 1:2-steps. The horizontal line indicates the cut-off value determined by measuring reactivity of HC sera to FHL1, the vertical line indicates the used dilution for the performed ELISA assays of 1:500. HC serum 5 (lower panel) was one of the 3 anti-FHL1<sup>+</sup> healthy individuals and revealed a comparable curve as the displayed anti-FHL1<sup>+</sup> myositis sera.

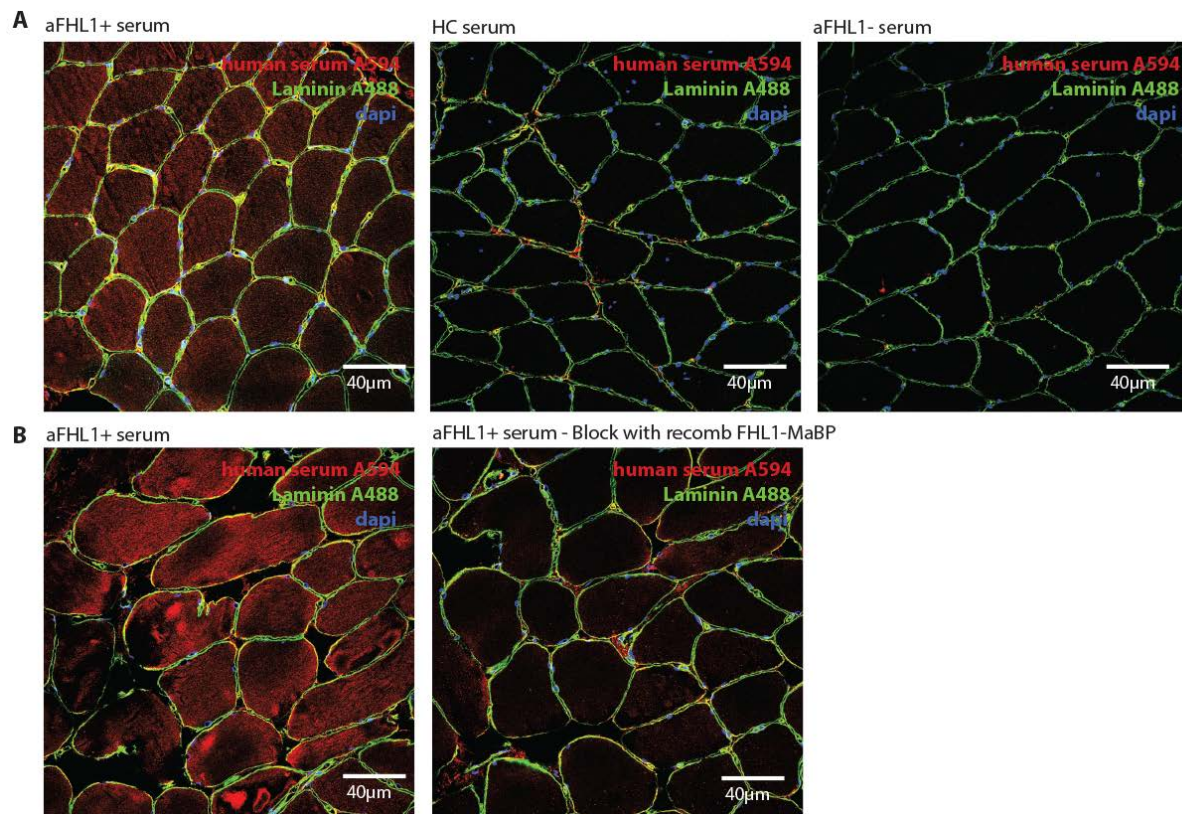

**Supplemental Figure 2: Reactivity of anti-FHL1<sup>+</sup> myositis sera with normal human muscle tissue.** (A) HC muscle tissue sections were stained with sera from anti-FHL1<sup>+</sup> patients (right panel, n=3), from HCs (middle panel, n=3) and from anti-FHL1<sup>-</sup> patients (left panel, n=3), and analyzed by confocal microscopy. (B) Anti-FHL1<sup>+</sup> sera (n=2) were pre-incubated with recombinant FHL1-MaBP and HC muscle tissue was stained with unblocked or blocked anti-FHL1<sup>+</sup> serum. Positive reactivity is displayed in red (anti-human IgG secondary antibody coupled to Alexa594), nuclei are visualized by using DAPI (blue); and laminin was stained to visualize the sarcolemma (green; Alexa488). Yellow staining in the sarcolemma indicates positive double staining for FHL1 in the sarcolemma. One representative staining is shown. The white bar indicates 40 μm.

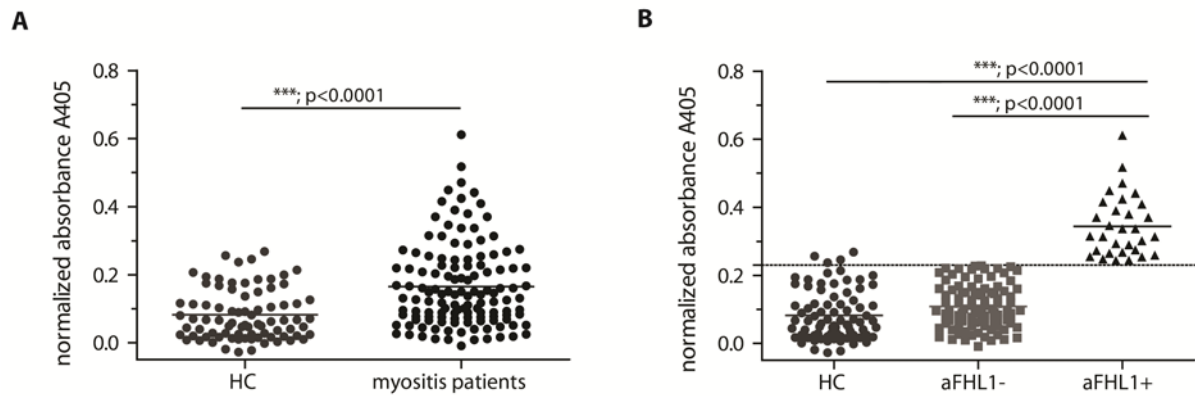

**Supplemental Figure 3: Reactivity to FHL1 in IIM patients of a cohort from the Czech Republic.**

(A) Sera of 129 IIM patients from a cohort from Czech Republic were analyzed by ELISA for reactivity to recombinant FHL1-MaBP fusion protein and compared to 81 Czech healthy controls (HC). (B) According to the normalized absorbance values of the HCs, a cut-off value (line) was calculated allowing subdivision of the patients into anti-FHL1<sup>-</sup> and anti-FHL1<sup>+</sup> patients. Statistical analysis: two-tailed Mann Whitney test. Each data point represents one individual and horizontal bars indicate mean values.

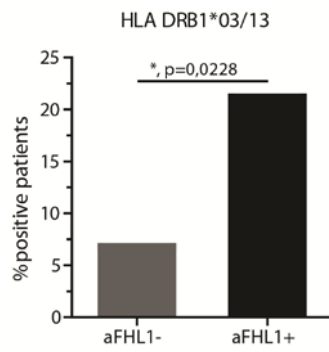

**Supplemental Figure 4: The HLA DRB1\*03/\*13 genotype is more frequent in anti-FHL1<sup>+</sup> vs anti-FHL1<sup>-</sup> patients.** Statistical analysis revealed that anti-FHL1<sup>+</sup> patients compared to anti-FHL1<sup>-</sup> patients had a higher incidence of showing HLA DRB1\*03/\*13 genotype (p= 0,0228; Chi-square test).

**A aFHL1+ with progressive disease**

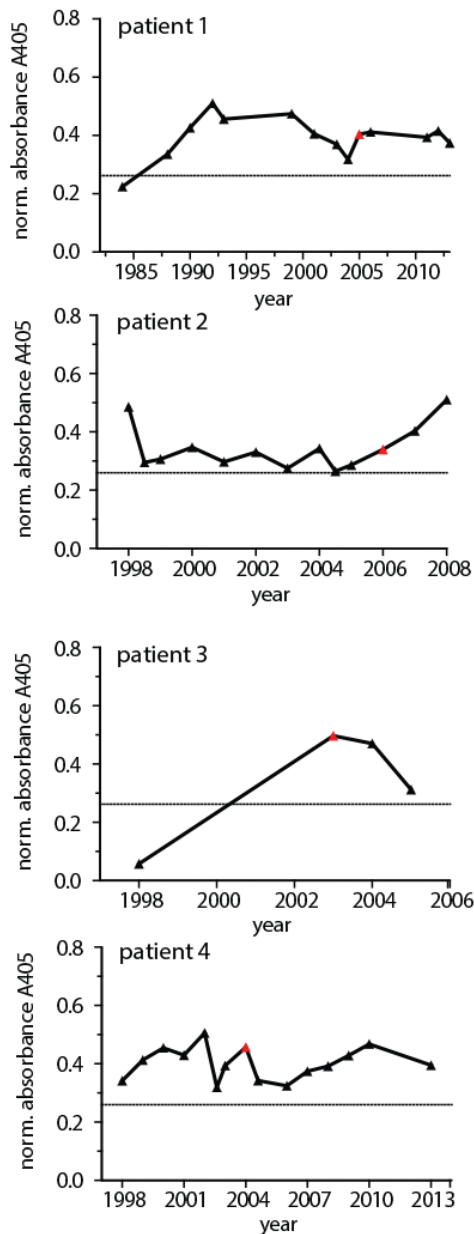

**B aFHL1+ with low disease activity**

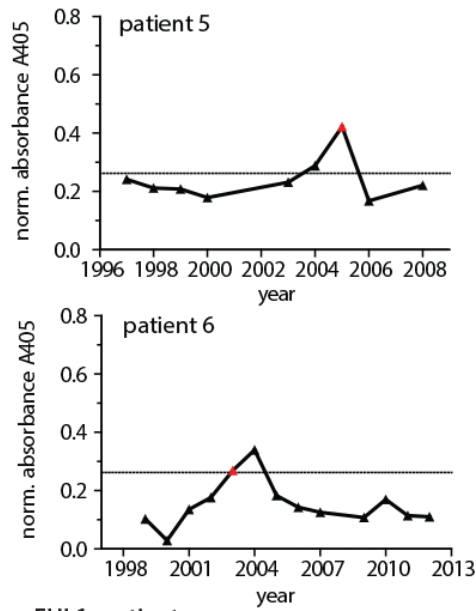

**C aFHL1- patients**

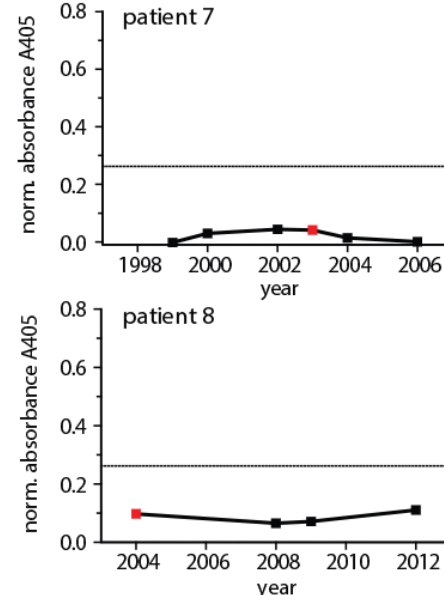

**Supplemental Figure 5: Stability of anti-FHL1 reactivity tested by ELISA of longitudinal samples.** (A) Longitudinal serum samples of four anti-FHL1<sup>+</sup> patients with therapy-resistant, progressive disease (score according Figure 2B=4.5-5), (B) of two anti-FHL1<sup>+</sup> patients who improved with immunosuppressive treatment (score=0 and 2, respectively), and (C) of two anti-FHL1<sup>-</sup> patients with stable disease, low disease activity, were analyzed by ELISA for reactivity to FHL1. The horizontal line indicates the cut-off value. The red symbol represents the time point of analysis displayed in Figure 1. Except for patient 3 (time point of diagnosis 2003), the first symbol on each graph indicates the time point of diagnosis.

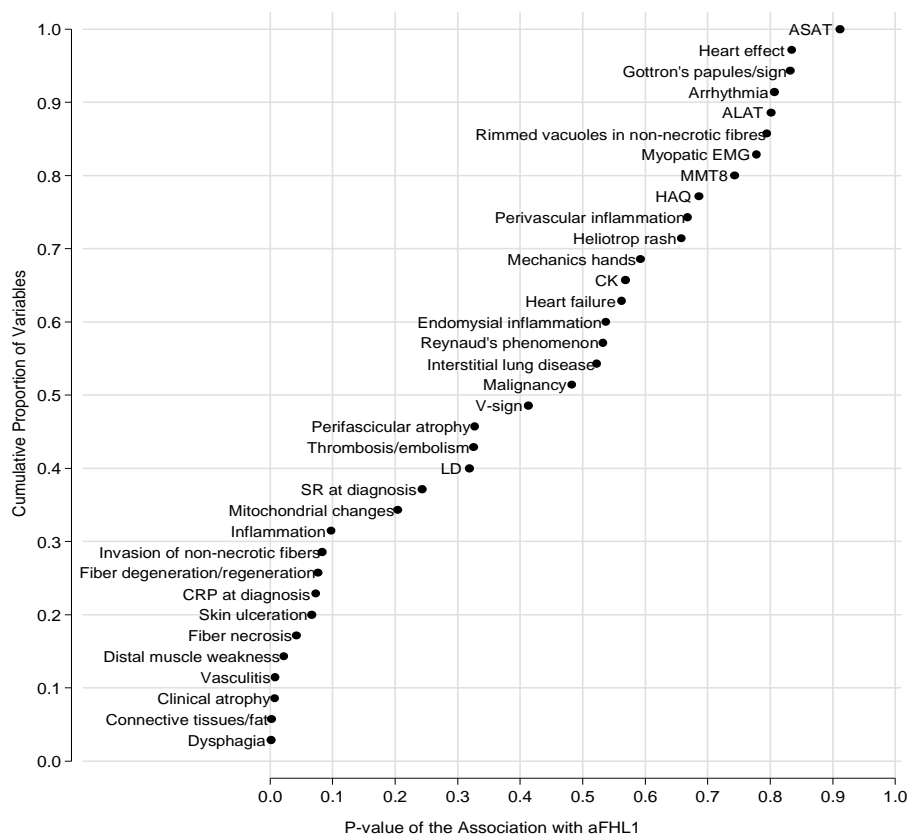

**Supplemental Figure 6: Test for proportion of p-values < 0.01 is equal to 0.1; Swedish cohort of IIM patients.** The variables considered are plotted against the p-value they showed when their association with the presence of anti-FHL1 autoantibodies was tested. The proportion of variables with a p-value < 0.10 was about 30%, significantly larger than what expected by mere chance (binomial exact test p-value < .01). The associations for muscle enzymes, CK, LD, ALAT and ASAT, were based on the highest measured level during a patient's disease history. For the clinical measurements MMT-8 and HAQ, the associations were based on the measurement at the latest visit found in the clinical records or registries. Abbreviations: aFHL1, anti-FHL1 autoantibody; CRP, C-reactive protein; ESR, erythrocyte sedimentation rate; LD, lactate dehydrogenase; CK, creatine kinase; HAQ, health assessment questionnaire; MMT-8, manual muscle test-8; EMG, electromyogram; ALAT, alanine aminotransferase; ASAT, aspartate aminotransferase.



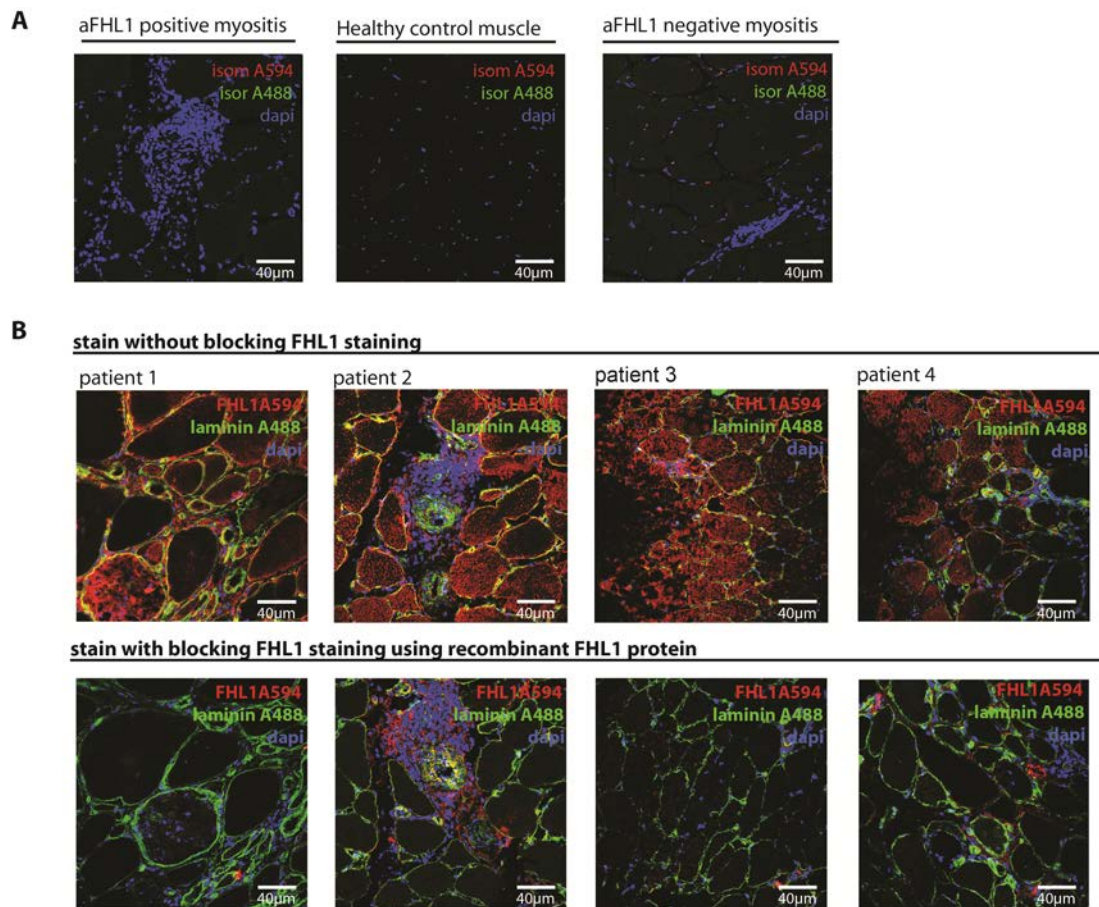

**Supplemental Figure 7: FHL1 confocal staining controls.** (A) Representative isotype stainings for anti-FHL1<sup>+</sup>, anti-FHL1<sup>-</sup> and HC muscle tissue. For monoclonal mouse anti-FHL1 (abcam, ab76912), a mouse IgG2a isotype together with a secondary anti-mouse antibody coupled to Alexa594 was used; control for laminin was a rabbit IgG together with a secondary anti-rabbit antibody coupled to Alexa488. Nuclei are stained with DAPI. Isotype stainings were performed for all samples shown in Fig. 3. (B) Monoclonal mouse anti-FHL1 was incubated with or without recombinant FHL1 protein over night at 4°C. The next day, serial sections of muscle tissue from 4 anti-FHL1<sup>+</sup> patients were stained with unblocked (upper panel) or blocked (lower panel) anti-FHL1 (secondary anti-mouse coupled to Alexa594) and visualized by confocal microscopy. Laminin was stained in addition (Alexa488) and nuclei are visualized by using DAPI (blue).

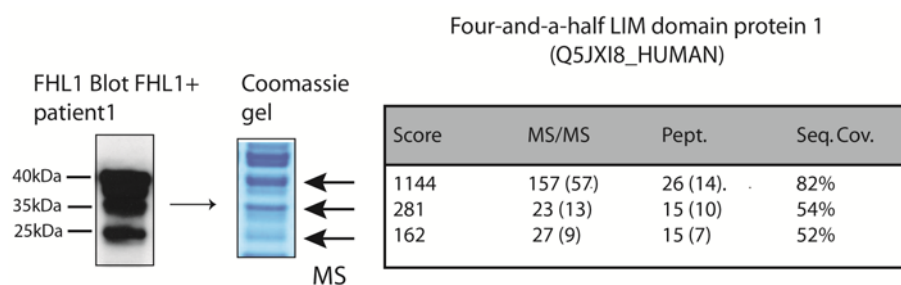

**Supplemental Figure 8: Detection of FHL1 in western blot bands of IIM muscle lysates by mass-spectrometry.** Bands identified by western blotting to contain FHL1 were excised from a Coomassie stained gel. After reduction, alkylation and tryptic digestion, the peptides were analyzed by Q Exactive MS and searched against the human complete proteome database using Mascot. Left panel shows part of a blot probed by anti-FLH1 antibodies, middle panel shows part of the Coomassie stained gel, and the table lists the protein scores, the number of MS/MS, the number of peptides and the sequence coverage for the FHL1 protein. The non-redundant numbers of MS/MS and peptides are given in parenthesis.



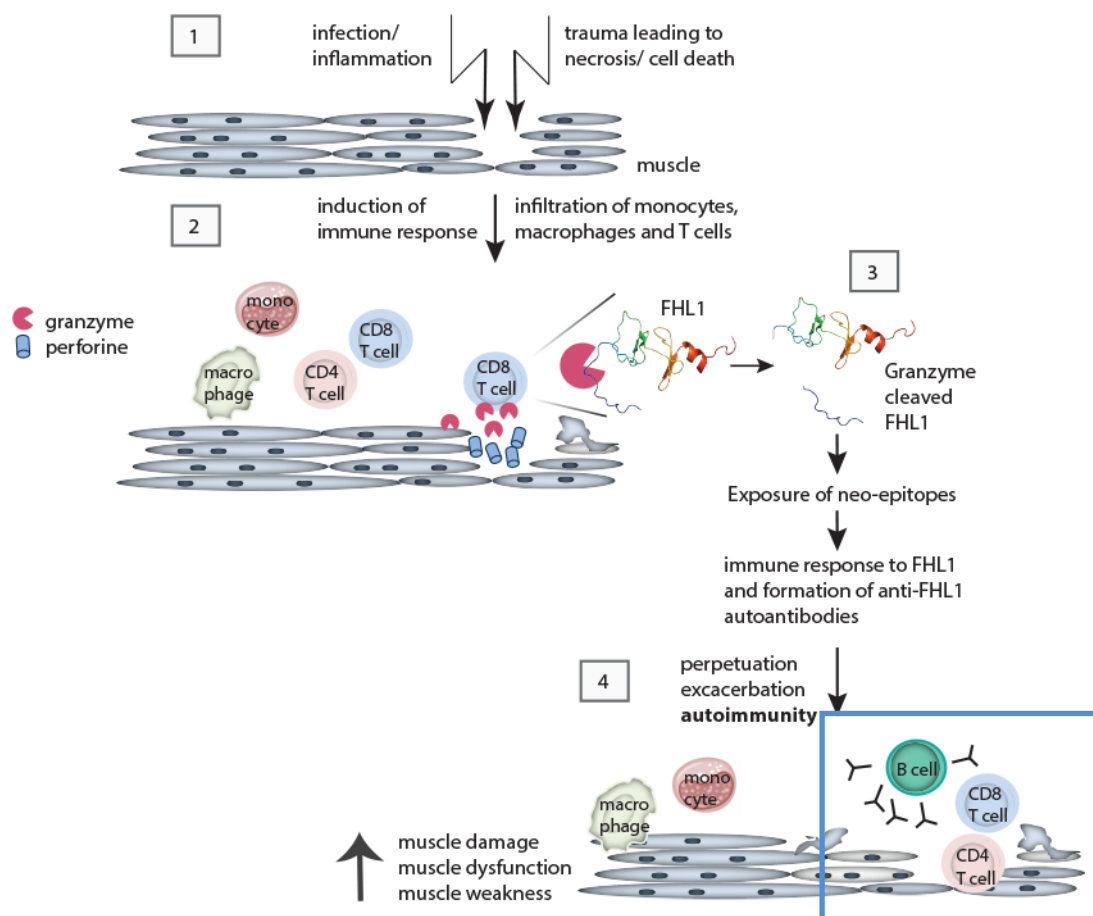

**Supplemental Figure 9: Proposed model for initiation of autoimmunity to FHL1.** Initial muscle damage occurs through infection and subsequent inflammatory response or trauma leading to necrosis/cell death (1). Pathogen-associated or damage-associated signals initiate infiltration of inflammatory cells and activate professional antigen-presenting cells which induce CD4 and CD8 T cell responses (2). Infiltrating CD8 T cells secrete granzymes and perforin. Granzyme-susceptible autoantigens including FHL1 are cleaved (3), leading to exposure of neo-epitopes and a specific immune response to FHL1 including activation of B cells and formation of anti-FHL1 autoantibodies. The final result is a break of tolerance, perpetuation and exacerbation of the initial immune response and initiation of autoimmunity leading to an increase of muscle damage and progressive muscle dysfunction and weakness (4).

## Supplemental Tables

**Supplemental Table 1.** Characteristics of the patients used for cDNA library screen

| <b>Patient</b> | <b>gender</b> | <b>age</b> | <b>diagnosis</b>  | <b>Autoantibody status</b> |
|----------------|---------------|------------|-------------------|----------------------------|
| A              | female        | 55         | DM                | Negative*                  |
| B              | female        | 57         | paraneoplastic DM | Negative*                  |
| C              | male          | 56         | PM                | Jo-1, Ro52                 |

Abbreviations: PM, polymyositis; DM, dermatomyositis; \* tested for ANA, Jo1, anti-SRP, Ro52, and anti-U1RNP

**Supplemental Table 2.** HLA haplotypes of the Swedish cohort of IIM patients

| <b>HLA DRB1<br/>n (%)</b> | <b>aFHL<sup>+</sup><br/>(n=33)</b> | <b>aFHL<sup>-</sup><br/>(n=88)</b> | <b>P value</b> |
|---------------------------|------------------------------------|------------------------------------|----------------|
| *01/*01                   | 0 (0.0)                            | 5 (5.7)                            | 0.3214         |
| *01/*03                   | 3 (9.1)                            | 10 (11.4)                          | 1.0000         |
| *01/*04                   | 0 (0.0)                            | 3 (3.4)                            | 0.5613         |
| *01/*08                   | 0 (0.0)                            | 1 (1.1)                            | 1.0000         |
| *01/*11                   | 0 (0.0)                            | 1 (1.1)                            | 1.0000         |
| *01/*13                   | 0 (0.0)                            | 1 (1.1)                            | 1.0000         |
| *01/*15                   | 1 (3.0)                            | 1 (1.1)                            | 0.4727         |
| *01/*16                   | 1 (3.0)                            | 0 (0.0)                            | 0.2727         |
| *03/*03                   | 2 (6.1)                            | 1 (1.1)                            | 0.1803         |
| *03/*04                   | 4 (12.1)                           | 9 (10.2)                           | 0.7490         |
| *03/*07                   | 0 (0.0)                            | 1 (1.1)                            | 1.0000         |
| *03/*08                   | 1 (3.0)                            | 3 (3.4)                            | 1.0000         |
| *03/*09                   | 1 (3.0)                            | 0 (0.0)                            | 0.2727         |
| *03/*10                   | 1 (3.0)                            | 1 (1.1)                            | 0.4727         |
| *03/*11                   | 1 (3.0)                            | 2 (2.3)                            | 1.0000         |
| <b>*03/*13</b>            | <b>7 (21.2)</b>                    | <b>6 (6.8)</b>                     | <b>0.0228</b>  |
| *03/*14                   | 1 (3.0)                            | 2 (2.3)                            | 1.0000         |
| *03/*15                   | 1 (3.0)                            | 8 (9.1)                            | 0.4416         |
| *03/*10                   | 0 (0.0)                            | 0 (0.0)                            | -              |
| *04/*04                   | 1 (3.0)                            | 3 (3.4)                            | 1.0000         |
| *04/*07                   | 2 (6.1)                            | 1 (1.1)                            | 0.1803         |
| *04/*08                   | 0 (0.0)                            | 1 (1.1)                            | 1.0000         |
| *04/*09                   | 1 (3.0)                            | 0 (0.0)                            | 0.2727         |
| *04/*13                   | 1 (3.0)                            | 6 (6.8)                            | 0.6724         |
| *04/*14                   | 1 (3.0)                            | 0 (0.0)                            | 0.2727         |
| *04/*15                   | 0 (0.0)                            | 2 (2.3)                            | 1.0000         |
| *07/*08                   | 0 (0.0)                            | 1 (1.1)                            | 1.0000         |
| *07/*11                   | 0 (0.0)                            | 1 (1.1)                            | 1.0000         |
| *07/*13                   | 0 (0.0)                            | 2 (2.3)                            | 1.0000         |
| *07/*14                   | 0 (0.0)                            | 1 (1.1)                            | 1.0000         |
| *07/*16                   | 0 (0.0)                            | 1 (1.1)                            | 1.0000         |
| *08/*11                   | 0 (0.0)                            | 1 (1.1)                            | 1.0000         |
| *08/*15                   | 1 (3.0)                            | 2 (2.3)                            | 1.0000         |
| *09/*13                   | 0 (0.0)                            | 1 (1.1)                            | 1.0000         |
| *09/*15                   | 0 (0.0)                            | 1 (1.1)                            | 1.0000         |
| *11/*11                   | 1 (3.0)                            | 2 (2.3)                            | 1.0000         |
| *11/*13                   | 0 (0.0)                            | 2 (2.3)                            | 1.0000         |
| *11/*14                   | 1 (3.0)                            | 0 (0.0)                            | 0.2727         |
| *11/*15                   | 0 (0.0)                            | 1 (1.1)                            | 1.0000         |
| *11/*16                   | 0 (0.0)                            | 1 (1.1)                            | 1.0000         |
| *13/*13                   | 0 (0.0)                            | 1 (1.1)                            | 1.0000         |
| *13/*15                   | 0 (0.0)                            | 1 (1.1)                            | 1.0000         |
| *15/*15                   | 0 (0.0)                            | 1 (1.1)                            | 1.0000         |

**Supplemental Table 3.** Descriptive characteristics of the Swedish cohort of IIM patients

| Variable                                                                           | aFHL1 <sup>+</sup><br>(n=33) | aFHL1 <sup>-</sup><br>(n=99) | Total<br>(n=132) | P value |
|------------------------------------------------------------------------------------|------------------------------|------------------------------|------------------|---------|
| Gender, n (%)                                                                      |                              |                              |                  |         |
| Female                                                                             | 26 (79)                      | 63 (64)                      | 89 (67)          | 0.135   |
| Male                                                                               | 7 (21)                       | 36 (36)                      | 43 (33)          |         |
| Diagnosis, n (%)                                                                   |                              |                              |                  |         |
| PM                                                                                 | 19 (58)                      | 47 (47)                      | 66 (50)          | 0.812   |
| DM                                                                                 | 10 (30)                      | 39 (39)                      | 49 (37)          |         |
| IBM                                                                                | 3 (9)                        | 9 (9)                        | 12 (9)           |         |
| JDM                                                                                | 1 (3)                        | 4 (4)                        | 5 (4)            |         |
| Ethnicity, n (%)                                                                   |                              |                              |                  |         |
| Caucasian                                                                          | 30 (91)                      | 95 (96)                      | 125 (95)         | 0.366   |
| Other                                                                              | 3 (9)                        | 4 (4)                        | 7 (5)            |         |
| Insidious progress of disease, n (%)                                               | 22 (71)                      | 64 (80)                      | 86 (77)          | 0.320   |
| Malignancy, n (%)                                                                  | 6 (18)                       | 26 (27)                      | 32 (24)          | 0.482   |
| Age at first symptom, median (IQR), years                                          | 49 (30-57)                   | 49 (39-61)                   | 49 (39-61)       | 0.604   |
| Age at diagnosis, median (IQR), years                                              | 50 (30-57)                   | 50 (40-63)                   | 50 (40-62)       | 0.652   |
| Age at serum test, median (IQR), years                                             | 59 (52-68)                   | 61 (48-67)                   | 60 (49-68)       | 0.827   |
| Disease duration until serum sampling <sup>a</sup> , median (IQR), years           | 8 (3-13)                     | 5 (1-8)                      | 5 (2-10)         | 0.058   |
| Disease duration until last clinical evaluation <sup>b</sup> , median (IQR), years | 12 (8-18)                    | 16 (9-19)                    | 11 (7-17)        | 0.066   |
| Heredity for neuromuscular diseases, n (%)                                         | 0 (0)                        | 2 (4)                        | 2 (2)            | 1.000   |
| Heredity for inflammatory, rheumatic diseases, n (%)                               | 7 (23)                       | 33 (42)                      | 40 (36)          | 0.078   |

<sup>a</sup> Time from diagnosis to serum sampling for anti-FHL1 autoantibody analysis

<sup>b</sup> Time from diagnosis to last clinical evaluation

Abbreviations: PM, polymyositis; DM, dermatomyositis; IBM, inclusion body myositis; JDM, juvenile dermatomyositis; IQR, interquartile range; MMT8, manual muscle test-8; HAQ, health assessment questionnaire

**Supplemental Table 4.** Clinical and muscle biopsy features of the Swedish cohort of IIM patients

| Variable                                         | aFHL1 <sup>+</sup><br>(n=33) | aFHL1 <sup>-</sup><br>(n=99) | Sensitivity<br>(%) | Specificity<br>(%) | Positive<br>predictive<br>value<br>(%) | Negative<br>predictive<br>value<br>(%) | P value      |
|--------------------------------------------------|------------------------------|------------------------------|--------------------|--------------------|----------------------------------------|----------------------------------------|--------------|
| <b>Clinical muscle features, n (%)</b>           |                              |                              |                    |                    |                                        |                                        |              |
| Muscle weakness                                  | 33 (100)                     | 96 (98)                      | 25.58              | 100.00             | 100.00                                 | 2.04                                   | 1.000        |
| Proximal muscle weakness                         | 31 (100)                     | 93 (97)                      | 25.00              | 100.00             | 100.00                                 | 3.13                                   | 1.000        |
| <i>Distal muscle weakness</i>                    | <b>29 (94)</b>               | <b>68 (74)</b>               | <b>29.90</b>       | <b>92.31</b>       | <b>93.55</b>                           | <b>26.09</b>                           | <b>0.022</b> |
| <i>Clinical muscle atrophy</i>                   | <b>21 (66)</b>               | <b>34 (37)</b>               | <b>38.18</b>       | <b>83.82</b>       | <b>65.63</b>                           | <b>62.64</b>                           | <b>0.007</b> |
| Myopathic EMG                                    | 26 (87)                      | 73 (83)                      | 26.26              | 78.95              | 86.67                                  | 17.05                                  | 0.778        |
| <b>Skin manifestations, n (%)</b>                |                              |                              |                    |                    |                                        |                                        |              |
| Gottron's papules                                | 11 (33)                      | 31 (31)                      | 26.19              | 75.56              | 33.33                                  | 68.69                                  | 0.832        |
| Heliotrope rash                                  | 8 (24)                       | 30 (30)                      | 21.05              | 73.40              | 24.24                                  | 69.70                                  | 0.658        |
| Mechanic's hands                                 | 7 (22)                       | 15 (16)                      | 31.82              | 75.25              | 21.88                                  | 83.52                                  | 0.592        |
| Raynaud's phenomenon                             | 14 (44)                      | 35 (37)                      | 28.57              | 76.92              | 43.75                                  | 63.16                                  | 0.532        |
| Calcinosis                                       | 4 (12)                       | 11 (11)                      | 26.67              | 75.00              | 12.12                                  | 88.78                                  | 1.000        |
| Shawl sign                                       | 4 (13)                       | 13 (14)                      | 23.53              | 74.31              | 12.50                                  | 86.17                                  | 1.000        |
| Skin ulceration                                  | 4 (12)                       | 3 (3)                        | 57.14              | 76.61              | 12.12                                  | 96.94                                  | 0.067        |
| V-sign                                           | 7 (21)                       | 14 (14)                      | 33.33              | 76.15              | 21.21                                  | 85.57                                  | 0.413        |
| <b>Extramuscular involvement, n (%)</b>          |                              |                              |                    |                    |                                        |                                        |              |
| Interstitial lung disease                        | 9 (27)                       | 35 (35)                      | 20.45              | 72.73              | 27.27                                  | 64.65                                  | 0.523        |
| <i>Dysphagia</i>                                 | <b>28 (85)</b>               | <b>52 (54)</b>               | <b>35.00</b>       | <b>89.80</b>       | <b>84.85</b>                           | <b>45.83</b>                           | <b>0.002</b> |
| Heart involvement overall                        | 11 (33)                      | 37 (37)                      | 22.92              | 73.81              | 33.33                                  | 62.63                                  | 0.835        |
| Arrhythmia                                       | 6 (18)                       | 22 (22)                      | 21.43              | 74.04              | 18.18                                  | 77.78                                  | 0.806        |
| Heart failure                                    | 3 (9)                        | 14 (14)                      | 17.65              | 74.34              | 9.38                                   | 85.71                                  | 0.562        |
| Myocarditis /cardiomyopathy                      | 1 (3)                        | 4 (4)                        | 20.00              | 75.63              | 3.33                                   | 95.74                                  | 1.000        |
| Thrombosis/embolism                              | 5 (15)                       | 8 (9)                        | 38.46              | 75.00              | 15.15                                  | 91.30                                  | 0.326        |
| <i>Vasculitis</i>                                | <b>6 (18)</b>                | <b>3 (3)</b>                 | <b>66.67</b>       | <b>77.69</b>       | <b>18.18</b>                           | <b>96.91</b>                           | <b>0.008</b> |
| Arthritis/synovitis                              | 15 (45)                      | 45 (45)                      | 25.00              | 75.00              | 45.45                                  | 54.55                                  | 1.000        |
| <b>Muscle biopsy features, n (%)</b>             |                              |                              |                    |                    |                                        |                                        |              |
| Inflammation                                     | 30 (94)                      | 75 (81)                      | 28.57              | 90.00              | 93.75                                  | 19.35                                  | 0.098        |
| Endomyrial inflammation                          | 19 (59)                      | 46 (52)                      | 29.23              | 76.79              | 59.38                                  | 48.31                                  | 0.537        |
| Perivascular inflammation                        | 22 (69)                      | 56 (63)                      | 28.21              | 76.74              | 68.75                                  | 37.08                                  | 0.668        |
| MHC class I expression in sarcolemma             | 16 (80)                      | 47 (81)                      | 25.40              | 73.33              | 80.00                                  | 18.97                                  | 1.000        |
| <i>Muscle fiber necrosis</i>                     | <b>7 (26)</b>                | <b>7 (9)</b>                 | <b>50.00</b>       | <b>78.49</b>       | <b>25.93</b>                           | <b>91.25</b>                           | <b>0.042</b> |
| Perifascicular atrophy                           | 9 (28)                       | 18 (20)                      | 33.33              | 76.23              | 28.13                                  | 80.43                                  | 0.327        |
| Rimmed vacuoles                                  | 5 (16)                       | 17 (18)                      | 22.73              | 73.53              | 15.63                                  | 81.52                                  | 0.795        |
| Invasion of non-necrotic fibers                  | 16 (52)                      | 28 (33)                      | 36.36              | 79.45              | 51.61                                  | 67.44                                  | 0.083        |
| Fiber degeneration / regeneration                | 24 (80)                      | 52 (62)                      | 31.58              | 84.21              | 80.00                                  | 38.10                                  | 0.077        |
| <i>Increased amount of connective tissue/fat</i> | <b>12 (44)</b>               | <b>11 (14)</b>               | <b>52.17</b>       | <b>81.93</b>       | <b>44.44</b>                           | <b>86.08</b>                           | <b>0.002</b> |
| Mitochondrial changes                            | 7 (32)                       | 7 (16)                       | 50.00              | 70.59              | 31.82                                  | 83.72                                  | 0.204        |

Abbreviations: EMG, electromyogram; MHC, major histocompatibility complex

**Supplemental Table 5.** Clinical and laboratory measures of the Swedish cohort of IIM patients

| <b>Variable,<br/>median (IQR)</b>  | <b>aFHL1<sup>+</sup><br/>(n=33)</b> | <b>aFHL1<sup>-</sup><br/>(n=99)</b> | <b>AUC</b> | <b>P value</b> |
|------------------------------------|-------------------------------------|-------------------------------------|------------|----------------|
| MMT8 at latest visit               | 74.5 (64.5-79.5)                    | 75 (63-79)                          | 0.521      | 0.743          |
| HAQ at latest visit                | 0.88 (0.44-1.815)                   | 1.25 (0.5-1.75)                     | 0.474      | 0.686          |
| Highest measured serum ALAT        | 1.24 (0.9-2.48)                     | 1.31 (0.88-2.52)                    | 0.485      | 0.801          |
| Highest measured serum ASAT        | 1.08 (0.88-2.57)                    | 1.44 (0.79-2.65)                    | 0.494      | 0.911          |
| Highest measured serum CK          | 12.9 (5.9-50)                       | 17.9 (8.1-52.8)                     | 0.467      | 0.569          |
| Highest measured serum LD          | 12.5 (8.65-22.2)                    | 10.95 (7.6-18)                      | 0.559      | 0.319          |
| CRP at diagnosis, before treatment | 7 (5.5-12)                          | 10 (7-38)                           | 0.368      | 0.073          |
| SR at diagnosis, before treatment  | 17 (10-35)                          | 22 (13-45.5)                        | 0.428      | 0.243          |

Abbreviations: IQR, interquartile range; AUC, area under the receiver operating characteristic curve;

MMT8, manual muscle test-8; ALAT, alanine aminotransferase; ASAT, aspartate aminotransferase;

CK, creatine kinase; LD, lactate dehydrogenase; CRP, C-reactive protein; ESR, erythrocyte

sedimentation rate

**Supplemental Table 6.** Autoantibody data of the Swedish cohort of IIM patients

| <b>Autoantibody, n (%)</b> | <b>aFHL1<sup>+</sup><br/>(n=33)</b> | <b>aFHL1<sup>-</sup><br/>(n=99)</b> | <b>P value</b> |
|----------------------------|-------------------------------------|-------------------------------------|----------------|
| ANA                        | 23 (77)                             | 43 (61)                             | 0.1202         |
| Jo-1                       | 3 (9)                               | 20 (20)                             | 0.1888         |
| SRP                        | 2 (6)                               | 3 (3)                               | 0.6029         |
| Ro52                       | 14 (42)                             | 31 (32)                             | 0.2589         |
| U1RNP                      | 6 (18)                              | 7 (7)                               | 0.0636         |
| <b>Autoantibody, n (%)</b> | <b>aFHL1<sup>+</sup><br/>(n=19)</b> | <b>aFHL1<sup>-</sup><br/>(n=39)</b> | <b>P value</b> |
| cN-1A                      | 3 (16)                              | 13(33)                              | 0.2174         |

Abbreviations: ANA, antinuclear antibodies; SRP, signal recognition particle; U1RNP, U1 ribonucleoprotein; cN-1A, cytosolic 5'-nucleotidase 1A
